# Supplementary material for: Aerosol-Induced Closure of Marine Cloud Cells: Enhanced Effects in the Presence of Precipitation
Source: Copernicus journal article supplement (doi:10.5194/egusphere-2023-2416), 2023-11-01
Supplement: Supplementary file 4 [file egusphere-2023-2416-supplement.zip]

Archive with 2 entries (2 files):
- MovieS1.mp4
- Supporting_Information.pdf
